# Supplementary material
Source: publisher figshare collection journal article supplement (https://acs.figshare.com/ndownloader/files/5109517)

## **SUPPORTING INFORMATION**

### **Europium(II) and Ytterbium(II) Cyclic Organohydroborates with Agostic Interactions**

Xuenian Chen, Soyoung Lim, Christine E. Plečnik, Shengming Liu,

Bin Du, Edward A. Meyers, Sheldon G. Shore

Department of Chemistry, The Ohio State University, Columbus, OH, 43210

## Table of Contents

|                    |                                                                                                                                                          |     |
|--------------------|----------------------------------------------------------------------------------------------------------------------------------------------------------|-----|
| <b>Table S1.</b>   | Crystallographic data for <b>3</b> , and <b>4</b> . .....                                                                                                | S1  |
| <b>Figure S1.</b>  | Molecular structure (10 % probability thermal ellipsoids) of the asymmetric unit of $\{K(THF)_4\}_2\{Eu\{(\mu-H)_2BC_8H_{14}\}_4\}$ , <b>3</b> . .....   | S2  |
| <b>Figure S2.</b>  | Molecular structure (5 % probability thermal ellipsoids) of $\{K(THF)_4\}_2\{Eu\{(\mu-H)_2BC_8H_{14}\}_4\}$ , <b>3</b> . .....                           | S3  |
| <b>Figure S3.</b>  | Molecular structure (10 % probability thermal ellipsoids) of the asymmetric unit of $\{K(THF)_4\}_2\{Yb\{(\mu-H)_2BC_8H_{14}\}_4\}$ , <b>4</b> . .....   | S4  |
| <b>Figure S4.</b>  | Molecular structure (5 % probability thermal ellipsoids) of $\{K(THF)_4\}_2\{Yb\{(\mu-H)_2BC_8H_{14}\}_4\}$ , <b>4</b> . .....                           | S5  |
| <b>Figure S5.</b>  | Molecular structure (50 % probability thermal ellipsoids) of the asymmetric unit of $[NMe_4]_2[Eu\{(\mu-H)_2BC_8H_{14}\}_4]$ , <b>5</b> . .....          | S6  |
| <b>Figure S6.</b>  | Molecular structure (25 % probability thermal ellipsoids) of $[NMe_4]_2[Eu\{(\mu-H)_2BC_8H_{14}\}_4]$ , <b>5</b> . .....                                 | S7  |
| <b>Figure S7.</b>  | Molecular structure (50 % probability thermal ellipsoids) of the asymmetric unit of $[NMe_4]_2[Yb\{(\mu-H)_2BC_8H_{14}\}_4]$ , <b>6</b> . .....          | S8  |
| <b>Figure S8.</b>  | Molecular structure (25 % probability thermal ellipsoids) of $[NMe_4]_2[Yb\{(\mu-H)_2BC_8H_{14}\}_4]$ , <b>6</b> . .....                                 | S9  |
| <b>Figure S9.</b>  | Molecular structure (25 % probability thermal ellipsoids) of the asymmetric unit of $\{K(MeTHF)_3\}_2\{Eu\{(\mu-H)_2BC_8H_{14}\}_4\}$ , <b>7</b> . ..... | S10 |
| <b>Figure S10.</b> | Molecular structure (10 % probability thermal ellipsoids) showing the disorderd MeTHF solvent in <b>7</b> . .....                                        | S11 |

|                    |                                                                                                                                                                                                  |     |
|--------------------|--------------------------------------------------------------------------------------------------------------------------------------------------------------------------------------------------|-----|
| <b>Figure S11.</b> | Molecular structure (25 % probability thermal ellipsoids) of the asymmetric unit of $\{\text{K}(\text{MeTHF})_3\}_2\{\text{Yb}\{(\mu\text{-H})_2\text{BC}_8\text{H}_{14}\}_4\}$ , <b>8</b> ..... | S12 |
| <b>Figure S12.</b> | Molecular structure (10 % probability thermal ellipsoids) showing the free disorderd MeTHF solvent in <b>8</b> . ....                                                                            | S13 |
| <b>Figure S13.</b> | Solid-state (KBr) IR spectra of $\{\text{K}(\text{THF})_4\}_2\{\text{Eu}\{(\mu\text{-H})_2\text{BC}_8\text{H}_{14}\}_4\}$ , <b>3</b> . ....                                                      | S14 |
| <b>Figure S14.</b> | Solid-state (KBr) IR spectra of $\{\text{K}(\text{THF})_4\}_2\{\text{Yb}\{(\mu\text{-H})_2\text{BC}_8\text{H}_{14}\}_4\}$ , <b>4</b> .....                                                       | S15 |
| <b>Figure S15.</b> | Solid-state (KBr) IR spectra of $[\text{NMe}_4]_2[\text{Eu}\{(\mu\text{-H})_2\text{BC}_8\text{H}_{14}\}_4]$ , <b>5</b> . ....                                                                    | S16 |
| <b>Figure S16.</b> | Solid-state (KBr) IR spectra of $[\text{NMe}_4]_2[\text{Yb}\{(\mu\text{-H})_2\text{BC}_8\text{H}_{14}\}_4]$ , <b>6</b> . ....                                                                    | S17 |
| <b>Figure S17.</b> | Solid-state (KBr) IR spectra of $\{\text{K}(\text{MeTHF})_3\}_2\{\text{Eu}\{(\mu\text{-H})_2\text{BC}_8\text{H}_{14}\}_4\}$ , <b>7</b> . ....                                                    | S18 |
| <b>Figure S18.</b> | Solid-state (KBr) IR spectra of $\{\text{K}(\text{MeTHF})_3\}_2\{\text{Yb}\{(\mu\text{-H})_2\text{BC}_8\text{H}_{14}\}_4\}$ , <b>8</b> . ....                                                    | S19 |

**Table S1.** Crystallographic data for complexes **3**, and **4**

|                                                       | <b>3</b>                                                                        | <b>4</b>                                                                       |
|-------------------------------------------------------|---------------------------------------------------------------------------------|--------------------------------------------------------------------------------|
| empirical formula                                     | C <sub>64</sub> H <sub>64</sub> O <sub>8</sub> B <sub>4</sub> Eu K <sub>2</sub> | C <sub>64</sub> H <sub>64</sub> O <sub>8</sub> B <sub>4</sub> YbK <sub>2</sub> |
| fw                                                    | 1299.06                                                                         | 1320.14                                                                        |
| space group                                           | P4(2)/nmc(No.137)                                                               | P4(2)/nmc(No.137)                                                              |
| <i>a</i> , Å                                          | 13.439(1)                                                                       | 13.3634(1)                                                                     |
| <i>b</i> , Å                                          | 13.439(1)                                                                       | 13.3634(1)                                                                     |
| <i>c</i> , Å                                          | 20.421(1)                                                                       | 20.2053(1)                                                                     |
| $\alpha$ , deg                                        | 90                                                                              | 90                                                                             |
| $\beta$ , deg                                         | 90                                                                              | 90                                                                             |
| $\gamma$ , deg                                        | 90                                                                              | 90                                                                             |
| <i>V</i> , Å <sup>3</sup>                             | 3688.2(4)                                                                       | 3608.27(4)                                                                     |
| <i>Z</i>                                              | 2                                                                               | 2                                                                              |
| D <sub>calcd</sub> , g·cm <sup>-3</sup>               | 1.170                                                                           | 1.215                                                                          |
| <i>T</i> , °C                                         | -33                                                                             | -73                                                                            |
| $\mu$ , mm <sup>-1</sup>                              | 1.009                                                                           | 1.458                                                                          |
| R1 [ <i>I</i> > 2 $\sigma$ ( <i>I</i> )] <sup>a</sup> | 0.0453                                                                          | 0.0510                                                                         |
| wR2 (all data) <sup>b</sup>                           | 0.1554                                                                          | 0.1784                                                                         |

$$^a \text{R1} = \sum ||F_o| - |F_c|| / \sum |F_o|.$$

$$^b \text{wR2} = [\sum w(F_o^2 - F_c^2)^2 / \sum w(F_o^2)^2]^{1/2}.$$

**Figure S1.** Molecular structure (10 % probability thermal ellipsoids) of the asymmetric unit of  $\{\text{K}(\text{THF})_4\}_2\{\text{Eu}\{(\mu\text{-H})_2\text{BC}_8\text{H}_{14}\}_4\}$ , **3**.

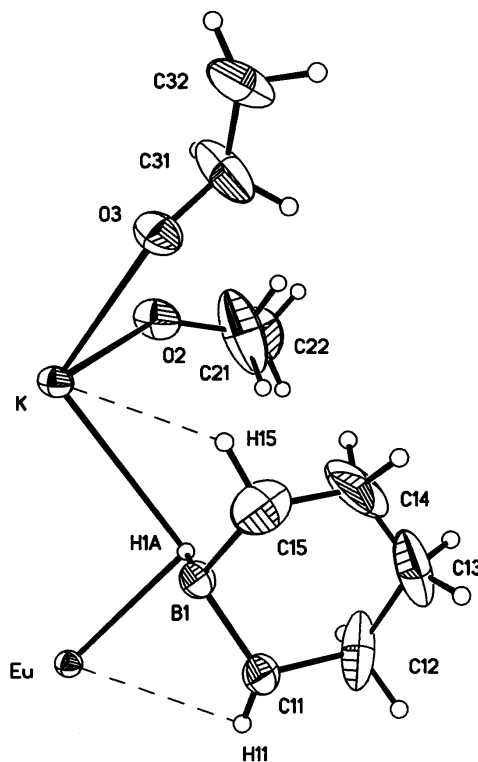

The Eu atom in **3** resides on a special position, (3/4, 1/4, 1/4). The asymmetric unit is comprised of 1/8 Eu atom, 1/4 K atom, a half of  $\{(\mu\text{-H})_2\text{BC}_8\text{H}_{14}\}_4$  unit and one THF solvent.

**Figure S2.** Molecular structure (5 % probability thermal ellipsoids) of  $\{K(THF)_4\}_2\{Eu\{(\mu-H)_2BC_8H_{14}\}_4\}$ , **3**.

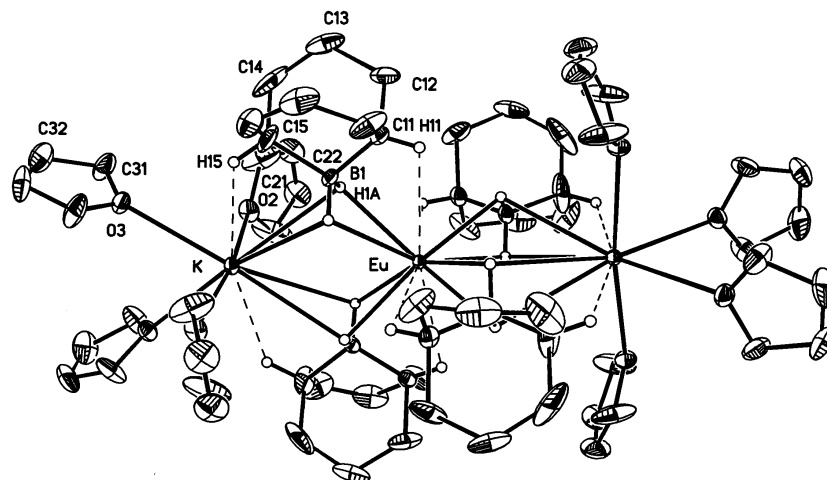

The remainder of **3** is generated by symmetry transformations through the Eu center. Symmetry transformations used to generate equivalent atoms: A(#1):  $y + 1/2, -x + 1, -z + 1/2$ ; B(#2):  $-y + 1, x - 1/2, -z + 1/2$ ; C(#3):  $-x + 3/2, -y + 1/2, z$ ; D(#4):  $x, -y + 1/2, z$ ; E(#5):  $-x + 3/2, y, z$ . The hydrogen atoms on THF solvent and on  $\beta$ -, and  $\gamma$  position in  $\{(\mu-H)_2BC_8H_{14}\}_4$  unit are omitted for clarity.

**Figure S3.** Molecular structure (10 % probability thermal ellipsoids) of the asymmetric unit of  $\{K(THF)_4\}_2\{Yb\{(\mu-H)_2BC_8H_{14}\}_4\}$ , **4**.

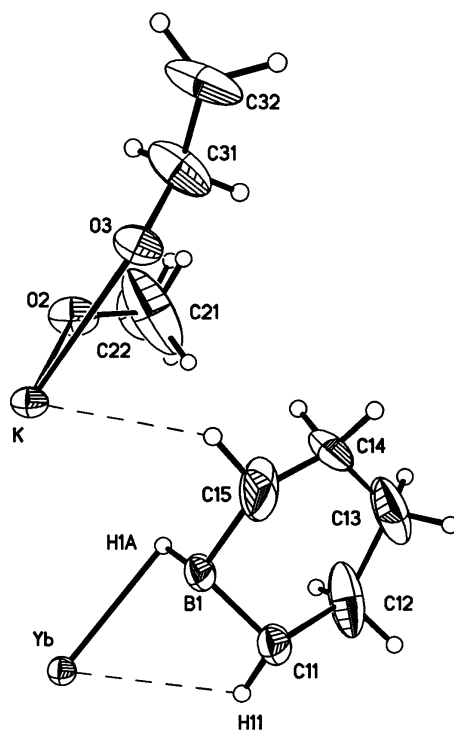

The Yb atom in **4** resides on a special position, (3/4, 1/4, 1/4). The asymmetric unit is comprised of 1/8 Yb atom, 1/4 K atom, a half of  $\{(\mu-H)_2BC_8H_{14}\}_4$  unit and one THF solvent.

**Figure 4.** Molecular structure (5 % probability thermal ellipsoids) of  $\{\text{K}(\text{THF})_4\}_2\{\text{Yb}\{(\mu\text{-H})_2\text{BC}_8\text{H}_{14}\}_4\}$ , **4**.

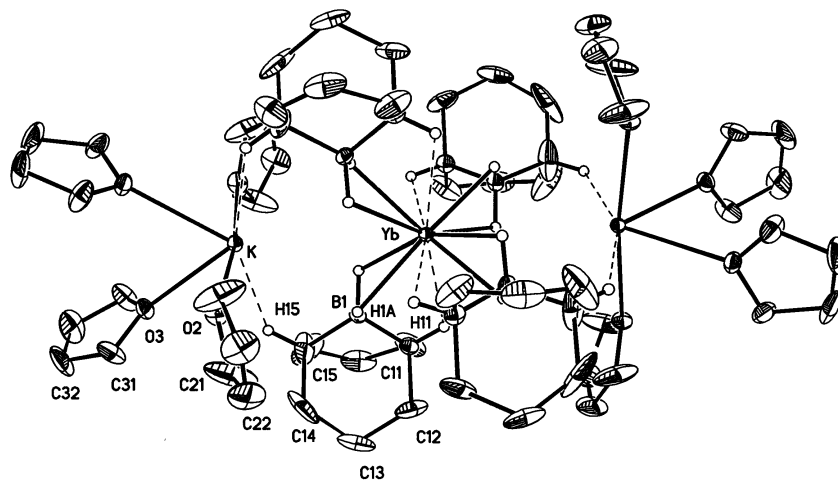

The remainder of **4** is generated by symmetry transformations through the Yb center. Symmetry transformations used to generate equivalent atoms: A(#1):  $y + 1/2, -x + 1, -z + 1/2$ ; B(#2):  $-y + 1, x - 1/2, -z + 1/2$ ; C(#3):  $-x + 3/2, -y + 1/2, z$ ; D(#4):  $x, -y + 1/2, z$ ; E(#5):  $-x + 3/2, y, z$ . The hydrogen atoms on THF solvent and on  $\beta$ - and  $\gamma$  position in  $\{(\mu\text{-H})_2\text{BC}_8\text{H}_{14}\}_4$  unit are omitted for clarity.



**Figure 5.** Molecular structure (50 % probability thermal ellipsoids) of the asymmetric unit of  $[\text{NMe}_4]_2[\text{Eu}\{(\mu\text{-H})_2\text{BC}_8\text{H}_{14}\}_4] \cdot 2\text{THF}$ , **5**·2**THF**.

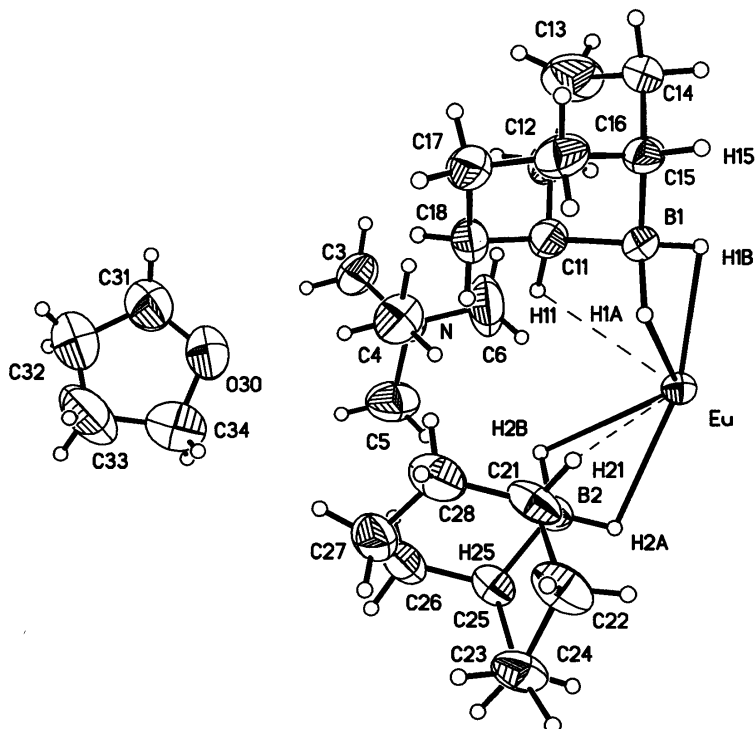

The Eu atom in **5** resides on a special position,  $(0, 1/2, z)$ . The asymmetric unit is comprised of a half of Eu atom, two  $\{(\mu\text{-H})_2\text{BC}_8\text{H}_{14}\}$  units, one THF solvent and one cation  $[\text{NMe}_4]^+$ .

7

**Figure 7.** Molecular structure (50 % probability thermal ellipsoids) of the asymmetric unit of  $[\text{NMe}_4]_2[\text{Yb}\{(\mu\text{-H})_2\text{BC}_8\text{H}_{14}\}_4]$ , **6**.

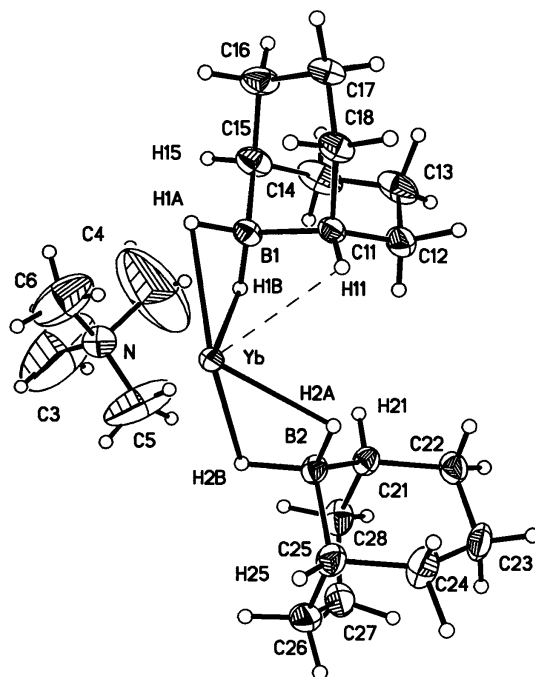

The Yb atom in **6** resides on a special position, (1/2, *y*, 3/4). The asymmetric unit is comprised of a half of Yb atom, two {(μ-H)<sub>2</sub>BC<sub>8</sub>H<sub>14</sub>} units, and one cation [NMe<sub>4</sub>]<sup>+</sup>.

**Figure 8.** Molecular structure (25 % probability thermal ellipsoids) of  $[\text{NMe}_4]_2[\text{Yb}\{(\mu\text{-H})_2\text{BC}_8\text{H}_{14}\}_4]$ , **6**.

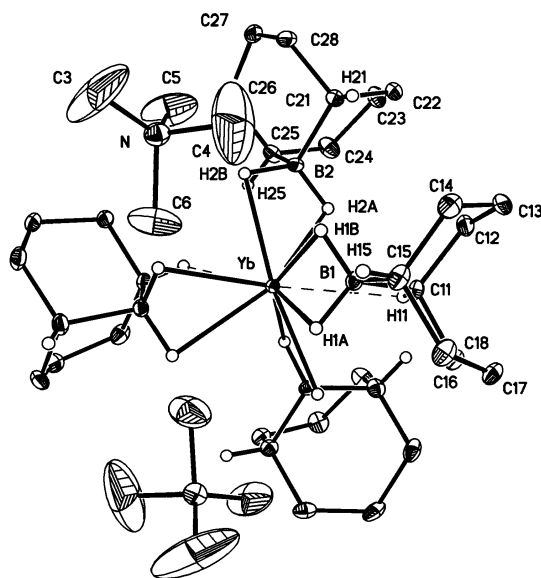

The remainder of **6** is generated by inversion through the Yb center. Symmetry transformation used to generate equivalent atoms:  $-x + 1, y, -z + 3/2$ . Hydrogen atoms on cation  $\text{NMe}_4$ , and  $\beta$ - and  $\gamma$ -position in the  $\{(\mu\text{-H})_2\text{BC}_8\text{H}_{14}\}$  unit are omitted for clarity.

**Figure 9.** Molecular structure (25 % probability thermal ellipsoids) of the asymmetric unit of  $\{K(\text{MeTHF})_3\}_2\{\text{Eu}\{(\mu\text{-H})_2\text{BC}_8\text{H}_{14}\}_4\}\cdot\text{MeTHF}$ , **7·MeTHF**.

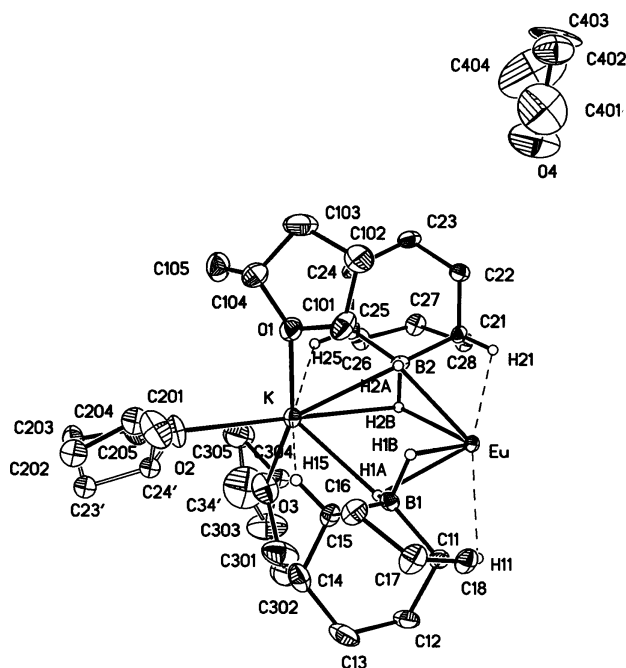

The Eu atom in **7·MeTHF** resides on a special position,  $(1/2, y, 3/4)$ . The asymmetric unit is comprised of Eu on an inversion center, one K atom, two  $\{(\mu\text{-H})_2\text{BC}_8\text{H}_{14}\}$  units, three coordinated MeTHF solvent ligands, and a half of free MeTHF ligand. Inversion through the Eu center generates the remainder of molecule. Symmetry transformation used to generate equivalent atoms:  $-x+1, y, -z+3/2$ . Hydrogen atoms on solvents MeTHF, and on  $\beta$ - and  $\gamma$ - position in  $\{(\mu\text{-H})_2\text{BC}_8\text{H}_{14}\}$  unit are omitted for clarity. The free MeTHF solvent and two coordinated MeTHF solvents are disordered.

**Figure 10.** Molecular structure (10 % probability thermal ellipsoids) showing the disorderd MeTHF solvent ligands and free MeTHF solvnt in **7·MeTHF**.

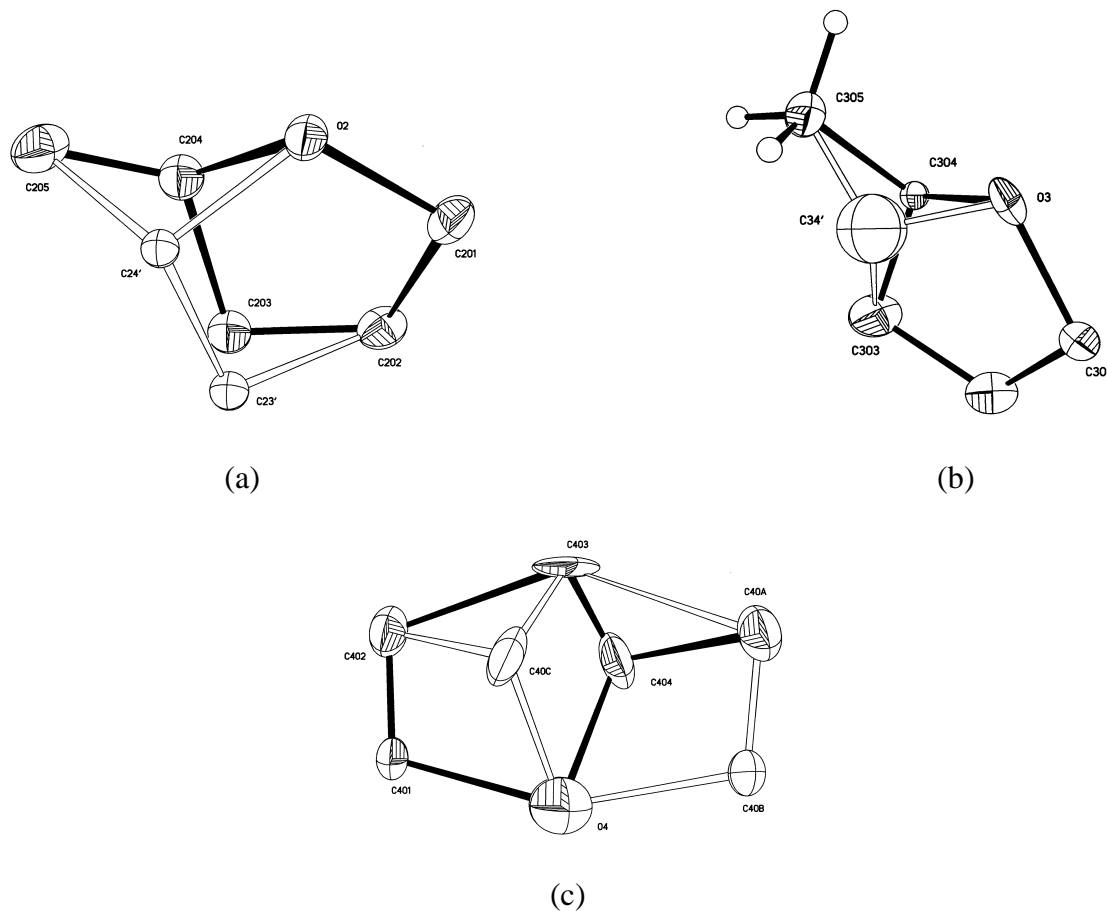

The  $\alpha$ -, and  $\beta$ -carbon in coordinated MeTHF solvents in **7·MeTHF** is disordered (Figure (a), (b)). These atoms were treated by splitting the MeTHF ring (C203, C204, and C304). The following site occupancy factors were determined: C203, C204, C304, 0.43; and C23', C24', C34', 0.57. The free MeTHF solvent in **7·MeTHF** is disordered (Figure (c)). The carbon atoms adopt two sets of alternate orientation that are related by rotation. The site occupancy factors of two sets are 50%. Two sets are represented by solid line and open line, respectively. Positions of hydrogen atoms on the disordered solvent ligands were not calculated.

**Figure 11.** Molecular structure (25 % probability thermal ellipsoids) of the asymmetric unit of  $\{K(MeTHF)_3\}_2\{Yb\{(\mu-H)_2BC_8H_{14}\}_4\} \cdot MeTHF, \mathbf{8} \cdot MeTHF$ .

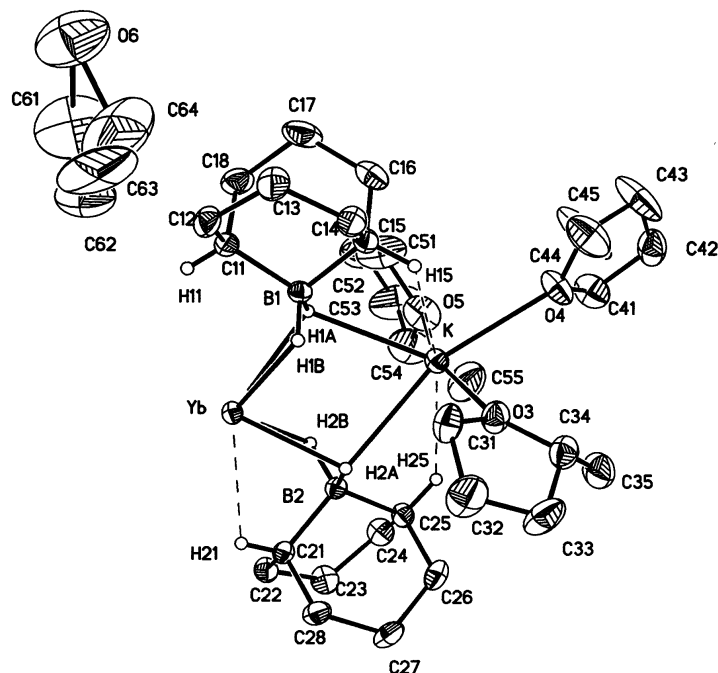

The Yb atom in **8·MeTHF** resides on a special position,  $(1, y, 5/4)$ . The asymmetric unit is comprised of Yb on an inversion center, one K atom, two  $\{(\mu-H)_2BC_8H_{14}\}$  units, three coordinated MeTHF solvent ligands, and a half of free MeTHF ligand. Inversion through the Yb center generates the remainder of molecule. Symmetry transformations used to generate equivalent atoms:  $-x + 2, y, -z + 5/2$  and  $-x + 1, y, -z + 5/2$ . Hydrogen atoms on solvents MeTHF, and on  $\beta$ - and  $\gamma$ - position in  $\{(\mu-H)_2BC_8H_{14}\}$  unit are omitted for clarity. The free MeTHF solvent is disordered.

**Figure 12.** Molecular structure (10 % probability thermal ellipsoids) showing the disorderd free THF solvent in **8·MeTHF**.

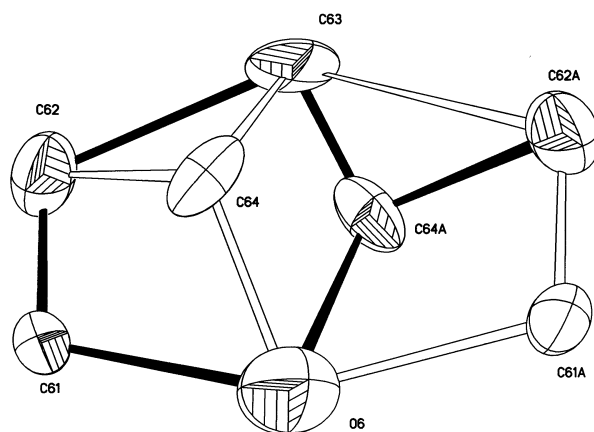

The free MeTHF solvent in **8·MeTHF** is disordered. The carbon atoms adopt two sets of alternate orientation that are related by rotation. The site occupancy factors of two sets are 50%. Two sets are represented by solid line and open line, respectively. Positions of hydrogen atoms on the disordered solvent ligands were not calculated.



**Figure 13.** Solid-state (KBr) IR spectra of  $\{K(THF)_4\}_2\{Eu\{(\mu-H)_2BC_8H_{14}\}_4\}$ , **3**.

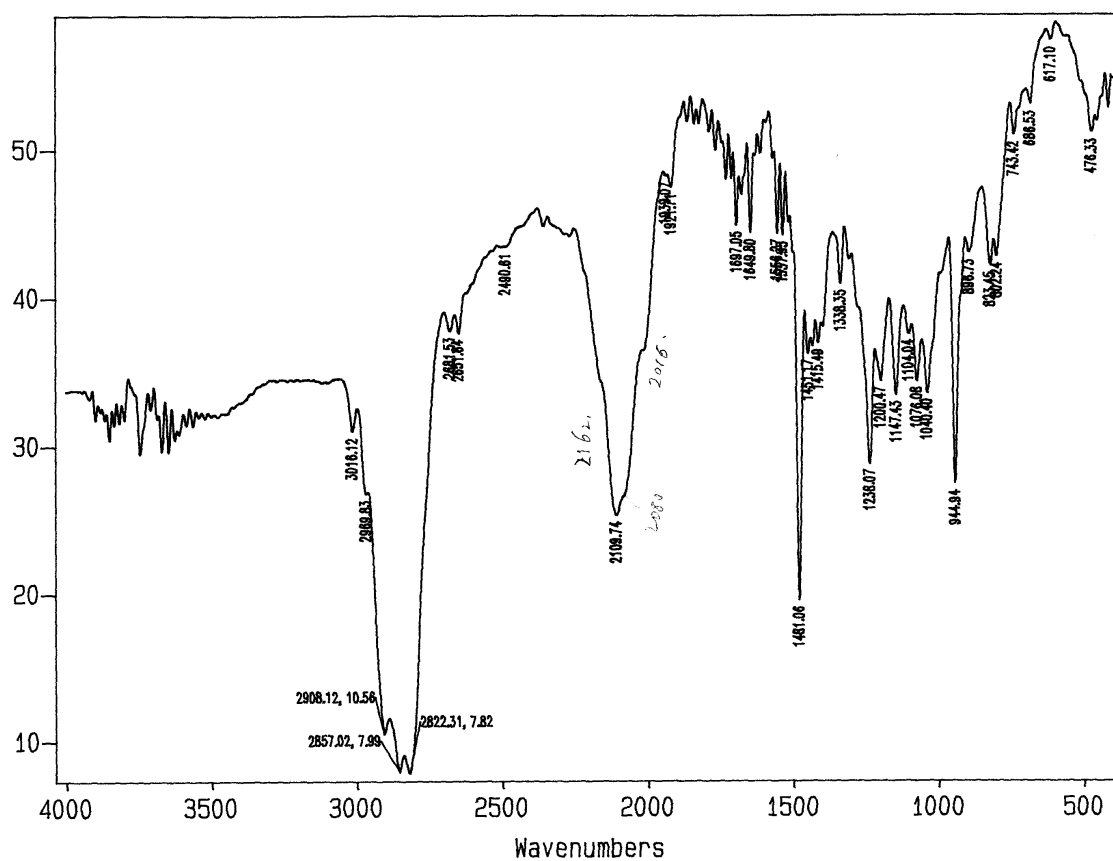

**Figure 14.** Solid-state (KBr) IR spectra of  $\{K(THF)_4\}_2\{Yb(\mu-H)_2BC_8H_{14}\}_4$ , **4**.

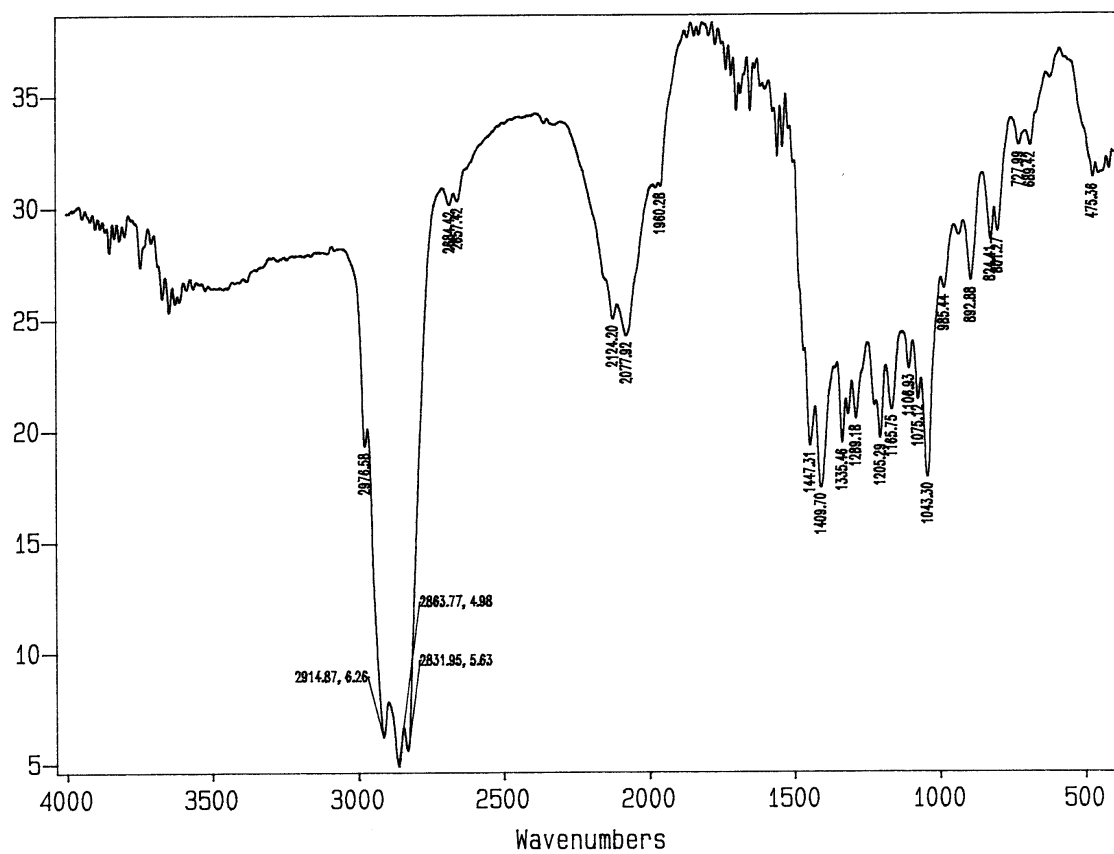

**Figure 15.** Solid-state (KBr) IR spectra of  $[\text{NMe}_4]_2[\text{Eu}\{(\mu\text{-H})_2\text{BC}_8\text{H}_{14}\}_4]$ , **5**.

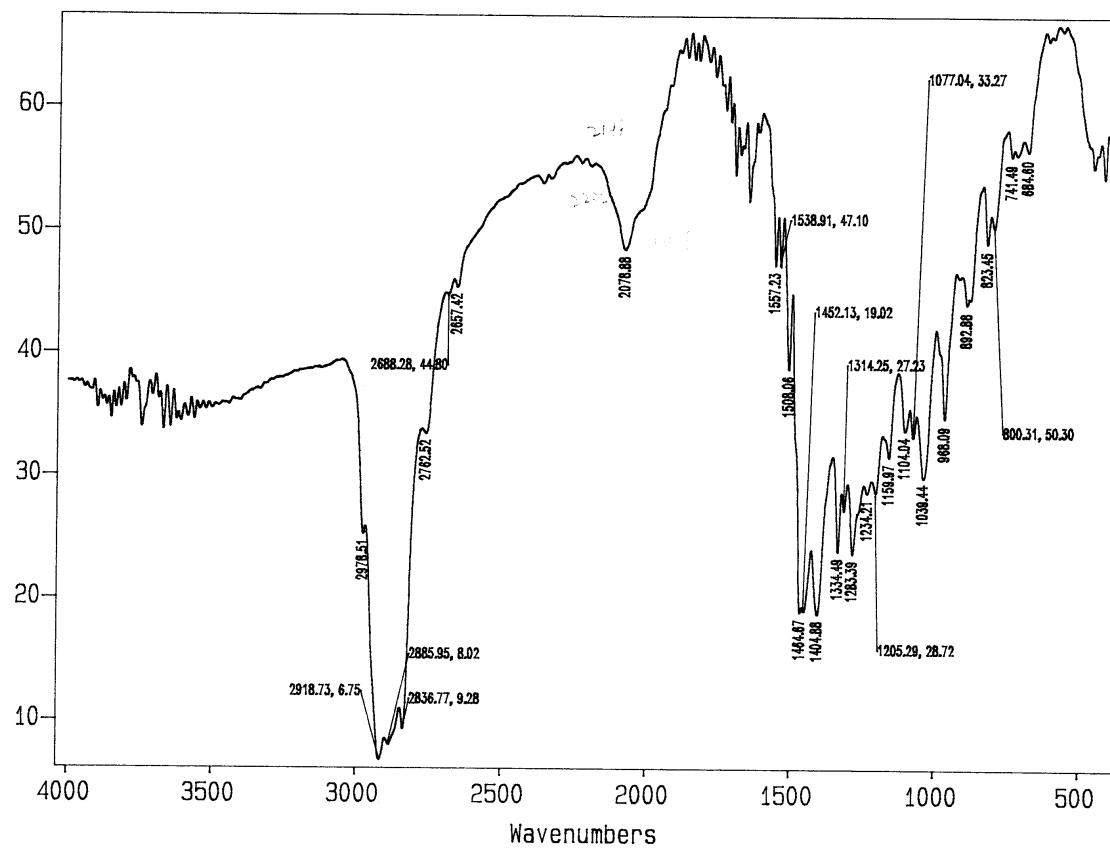

**Figure 16.** Solid-state (KBr) IR spectra of  $[\text{NMe}_4]_2[\text{Yb}\{(\mu\text{-H})_2\text{BC}_8\text{H}_{14}\}_4]$ , **6**.

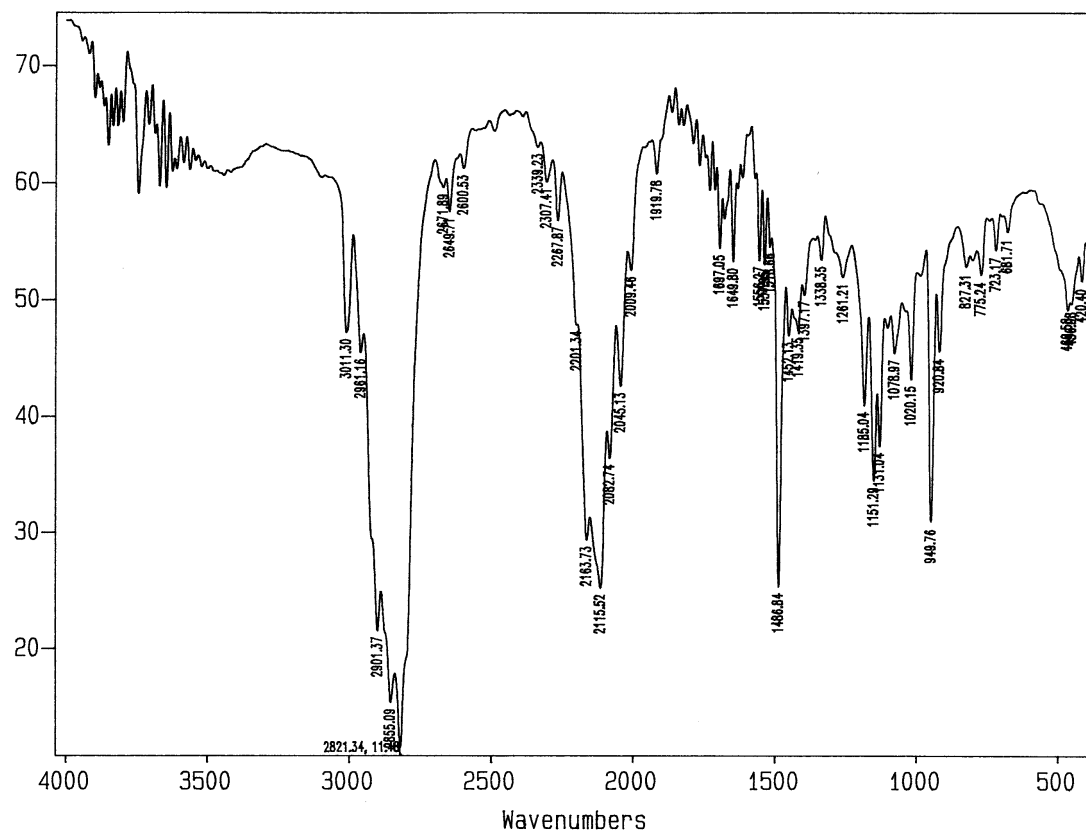

**Figure 17.** Solid-state (KBr) IR spectra of  $\{K(MeTHF)_3\}_2\{Eu\{(\mu-H)_2BC_8H_{14}\}_4\}$ , **7**.

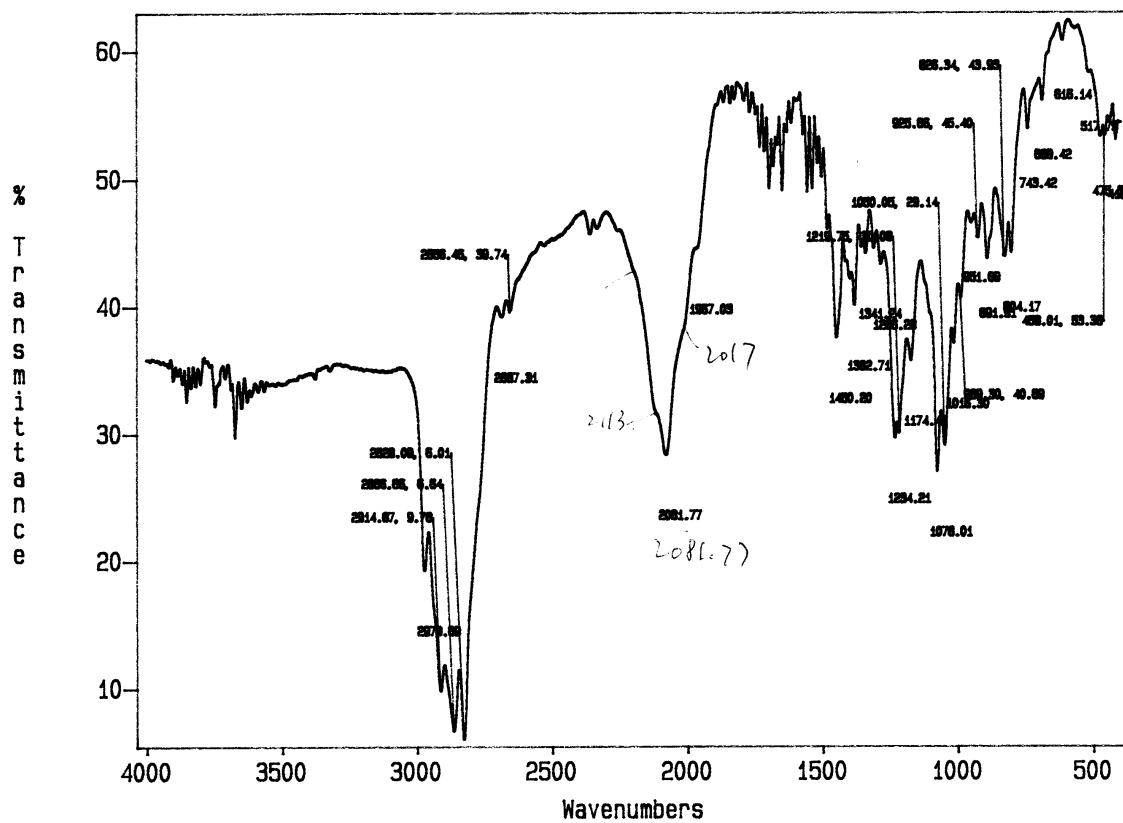

**Figure 18.** Solid-state (KBr) IR spectra of  $\{\text{K}(\text{MeTHF})_3\}_2\{\text{Yb}\{(\mu\text{-H})_2\text{BC}_8\text{H}_{14}\}_4\}$ , **8**.

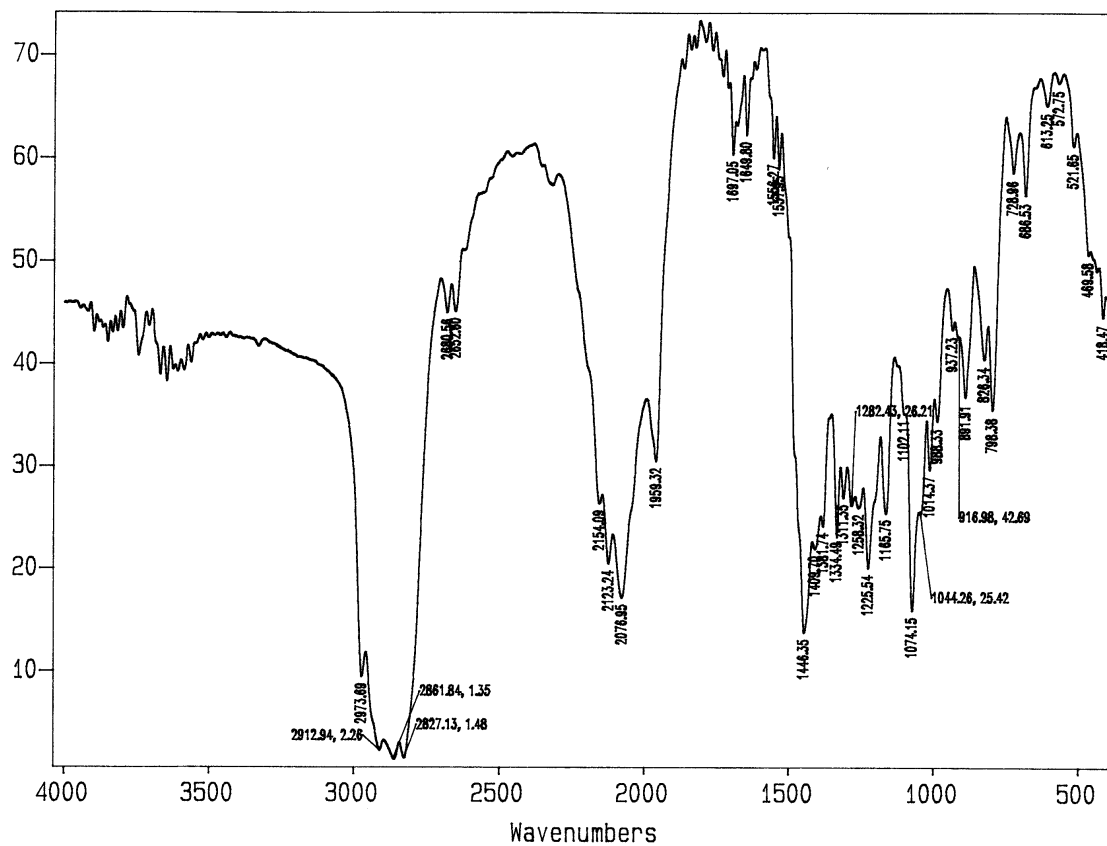

Supplement: Supplementary file 1 [file 5109517]
